# Supplementary material
Source: Royal Society of Chemistry journal article supplement (doi:10.1039/d6dt00445h)
Supplement: d6dt00445h1.pdf [file d6dt00445h1.pdf]

ARTICLE

**Supporting Information for**

Received 00th January 20xx,

**Deciphering the Atomic-Scale Evolution Pathway of Keggin-Type Aluminum Nanoclusters in Aqueous Media**

Qi Zhao, Minjuan Zhao, Yufei Sun, Xiuling Jiao, Yuguo Xia,\* and Dairong Chen\*

---

<sup>a</sup> National Engineering Research Center for Colloidal Materials, School of Chemistry and Chemical Engineering, Shandong University, 250100 Jinan, Shandong, China;  
E-mail: xyg@sdu.edu.cn, cdr@sdu.edu.cn

**COMPUTATIONAL METHODS AND EXPERIMENTAL SECTION**

**Computational Methods.** AIMD simulations were conducted using the Quickstep module of the CP2K-7.1 package.<sup>1,2</sup> The Becke-Lee-Yang-Parr (BLYP) density functional, coupled with Grimme's D3 empirical dispersion correction, was employed, as previous studies indicate its effectiveness in examining the behavior of aluminum polyoxocations in aqueous environments.<sup>3-7</sup> To accurately depict the potential near the nucleus, the Goedecker-Teter-Hutter (GTH) pseudopotential was utilized.<sup>8</sup> A hybrid Gaussian and Plane Wave (PW) approach was adopted, featuring a double  $\zeta$ -valence enhanced polarization Gaussian basis set and the PW expansion of the charge density with a cutoff energy of 300 Ry.<sup>9,10</sup> The self-consistent field method achieved convergence with an accuracy of  $10^{-6}$  au. Additionally, AIMD simulations were performed in a canonical ensemble (NVT) at 363 K, with the temperature regulated by a Nose-Hoover thermostat. The time step for nuclear motion in the AIMD was set to 0.5 fs.<sup>11,12</sup>

**Model Setup and Details for AIMD Simulation.** The Al<sub>10</sub> cubic box measures 25 Å × 25 Å × 13 Å and contains 1 Al<sub>10</sub> molecule and 247 H<sub>2</sub>O molecules, totaling 830 atoms, with a density of approximately 1 g cm<sup>-3</sup>. The system has a net charge of +7, and a compensation gel background is included to prevent divergence. All starting reactants are pre-equilibrated for at least 2 ps.<sup>13</sup>

**Well-Tempered Metadynamics.** For the well-tempered ab initio metadynamics simulations, a Gaussian hill with a width of 0.2 and an initial height of 15.1 kJ mol<sup>-1</sup> was incorporated into the two-dimensional path (*pp*) variables defined in PLUMED-2.9.0.<sup>14</sup> The reference path connecting the reactants and products consisted of nine equally spaced points within the two critical distances. Then, two collective variables (CVs) were used in pMtD to measure the following: (i) the progress of the system along the reference path (*S*) and (ii) the distance of the sampled configurations from the path (*Z*).<sup>15</sup> Wall constraints were implemented to ensure the plausibility of the metadynamic structure. The results from the well-tempered metadynamics were analyzed using the metadynminer package.

**Static Calculations and Topological Analysis.** All static calculations were conducted with Gaussian 16.<sup>16</sup> The geometry optimization and frequency calculations were carried out at the B3LYP/6-31g(d) level, incorporating the D3 empirical dispersion correction and a polarizable continuum model (PCM) to account for solvent effects.<sup>17</sup> The absence of imaginary frequencies in the vibrational frequency analysis post-geometry optimization confirmed the stability of the conformation. Single-point energies were determined at the PBE/def-TZVP level. The interaction between O and Al was investigated via topological analysis of the electron density, as per the quantum theory of atoms in molecules. The characteristics of the Al-O ligand bond were described using various electron densities at bond critical points (BCPs), with the topological analysis descriptors being computed by Multiwfn software.<sup>18,19</sup>

**Synthesis.** The  $\epsilon$ -Al<sub>13</sub> solution was prepared by gradually adding aluminum powder to the AlCl<sub>3</sub> (or Al(NO<sub>3</sub>)<sub>3</sub>) solution. The temperature of synthesis was 70 °C to ensure a complete reaction of the aluminum powder. Subsequently, the solution was placed at room temperature and subjected to filtration. The obtained Al<sup>3+</sup>/Al molar ratio of the  $\epsilon$ -Al<sub>13</sub> solution was 4.5 (while the molar ratio of Al<sup>3+</sup>/Al was 2.0 in the Al(NO<sub>3</sub>)<sub>3</sub> solution). The target sample was prepared using 5 mL of a stock solution of 0.5 M  $\epsilon$ -Al<sub>13</sub> and various HCl/HNO<sub>3</sub>. The specific solution composition, aging duration, and aging temperature are shown in **Tables S1** and **S2**. The concentrated system was prepared by rotary evaporation of 15g of solution at 40 °C until half of its original mass was obtained.

**Characterization.** The liquid sample <sup>27</sup>Al NMR spectra were acquired on a Bruker Avance 500 MHz spectrometer, and the solid-state <sup>27</sup>Al (150.03 MHz) CP MAS NMR spectra were performed on a Bruker WB 600 spectrometer at 300 K with a 4.0 mm double channel probe head. Samples were carefully packed into a 4.0 mm cylindrical zirconia rotor with Kel-F caps. <sup>27</sup>Al spectra were originally calibrated with an aluminum nitrate solution as the standard sample. The <sup>27</sup>Al CP/TOSS (total suppression of sidebands) and <sup>27</sup>Al CP/TOSSNQS (non-quarternary suppression) experiments were performed with a spinning speed of 15 kHz, and recycle delays of 5 s were applied. Wide-angle X-ray scattering (WAXS) data were obtained from Xenocs' in-house X-ray scattering beamline, Xeuss 3.0, France. Mass spectrum (MS) was recorded on a Bruker Impact II high-definition mass spectrometer, quadrupole, and time-of-flight (Q/TOF) modules in positive ion mode. Typical measurement conditions are as follows: end plate offset = -500 V; dry gas = 4 L min<sup>-1</sup>, nebulizer = 0.4 bar, capillary voltage = 2600 V.

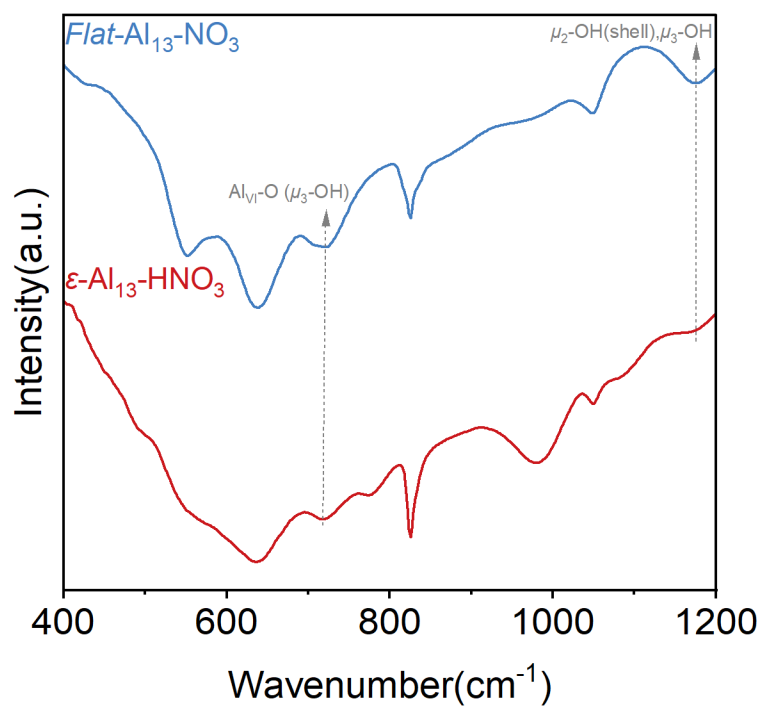

**Fig. S1.** IR spectra of the titration process of  $\epsilon\text{-Al}_{13}\text{-NO}_3$  solution and *Flat-Al<sub>13</sub>* crystal.

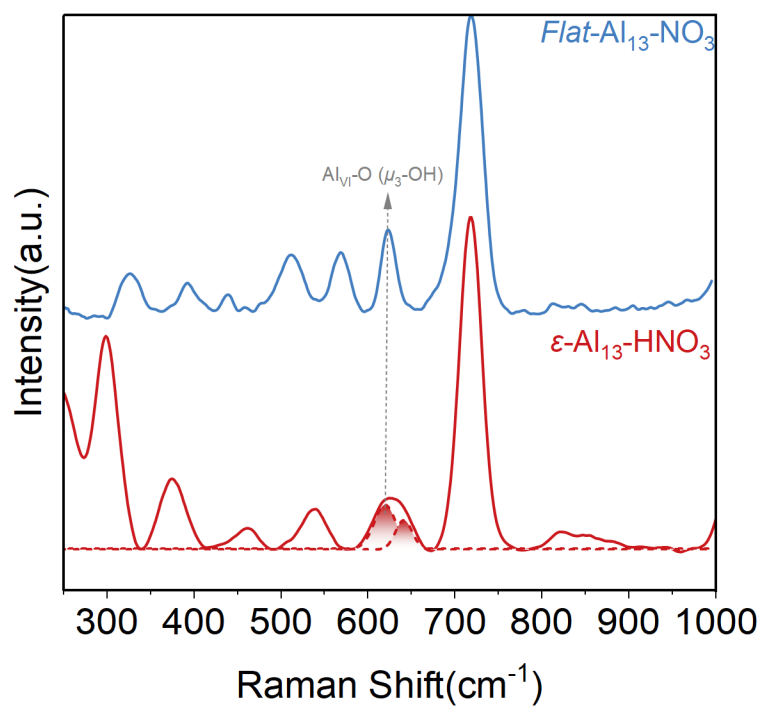

**Fig. S2.** Raman spectra of the titration process of  $\epsilon$ -Al<sub>13</sub>-NO<sub>3</sub> solution and *Flat*-Al<sub>13</sub> crystal.

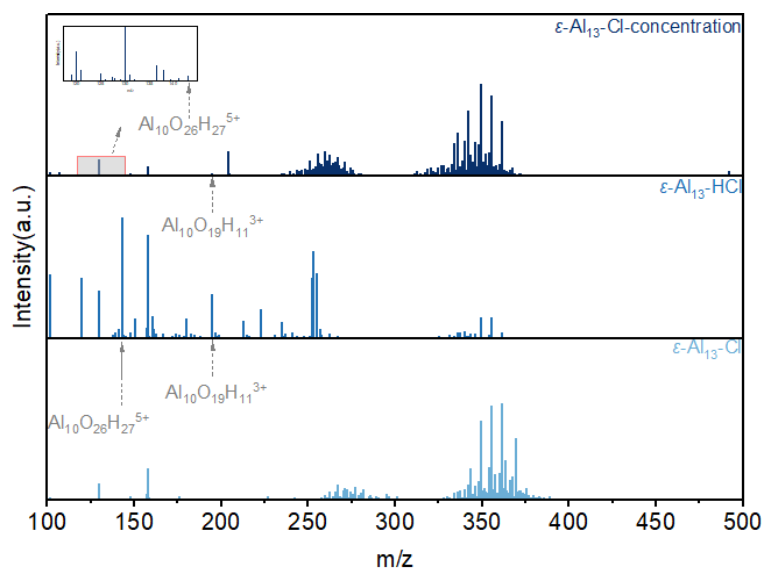

**Fig. S3.** ESI-MS spectra of the titration and concentration process of  $\epsilon\text{-Al}_{13}\text{-Cl}$  solution.

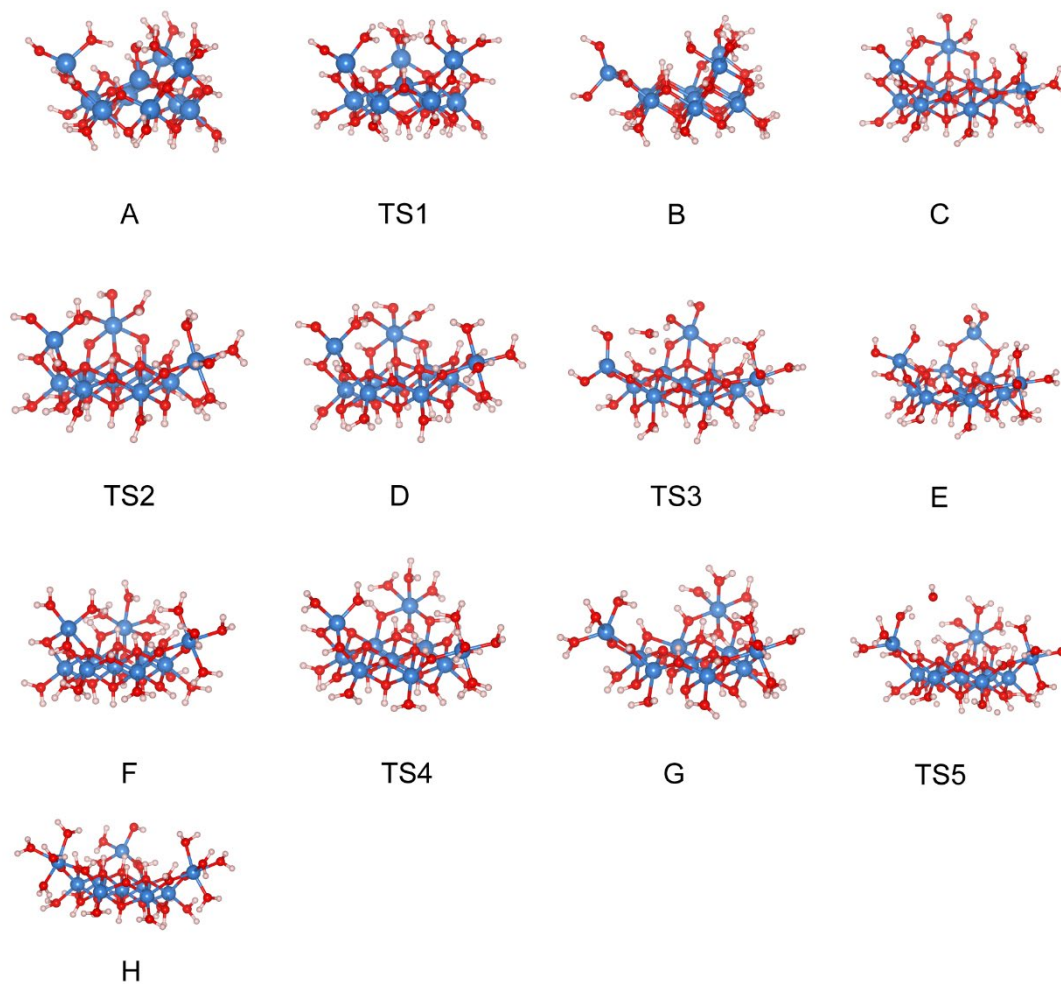

**Fig. S4.** The structure of each intermediate of the *Cage-to-Flat-Al<sub>10</sub>* transformation

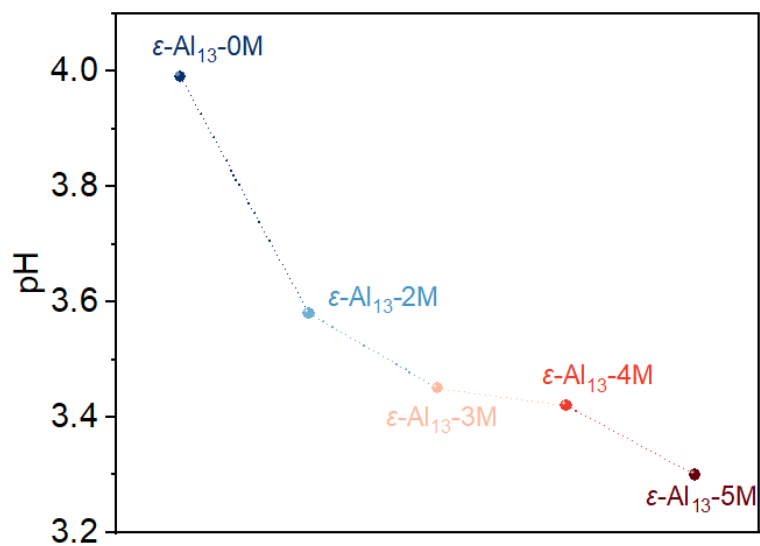

**Fig. S5.** The pH of the acid titration process of  $\epsilon\text{-Al}_{13}\text{-Cl}$  solution.

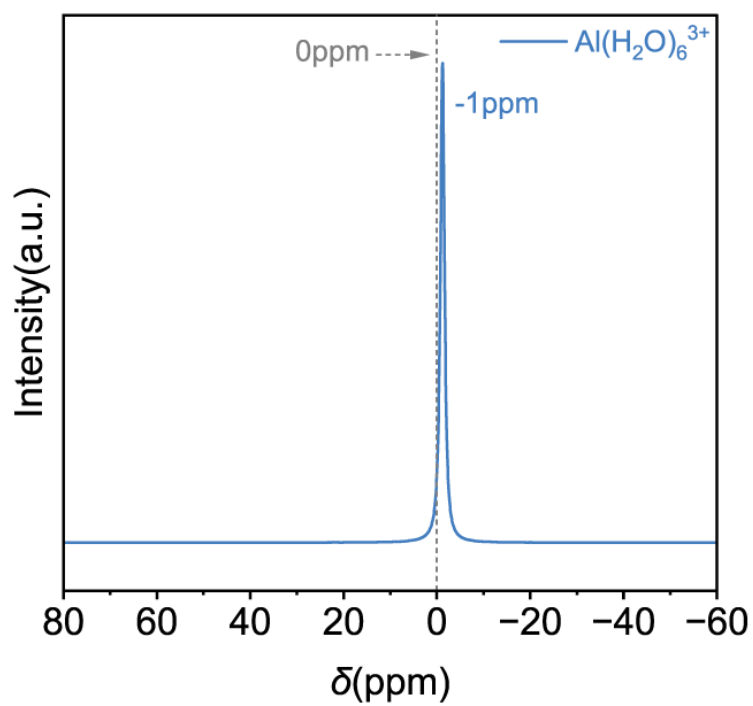

**Fig. S6.** The solid  $^{27}\text{Al}$  NMR spectra of  $\text{Al}(\text{H}_2\text{O})_6^{3+}$ .

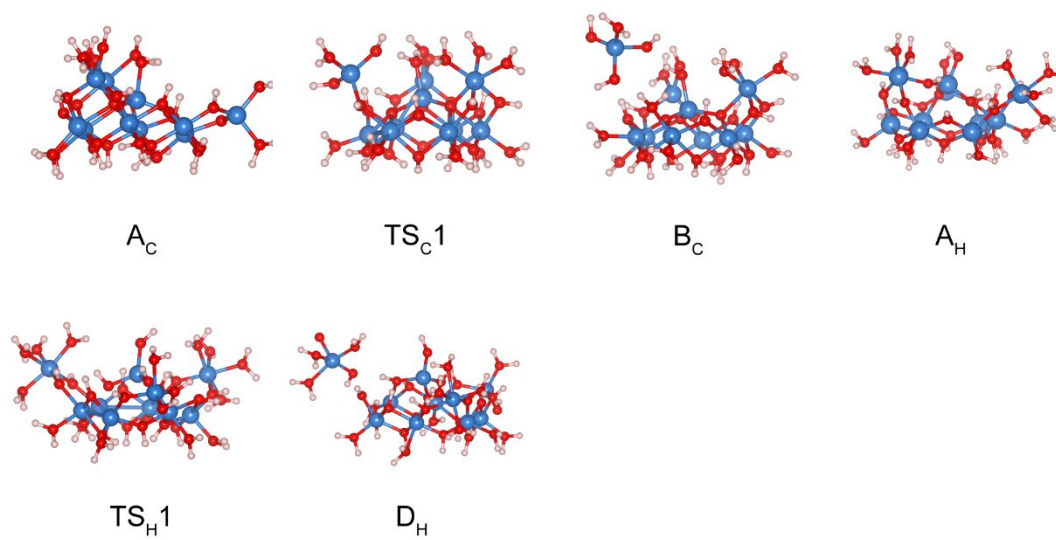

**Fig. S7.** The structure of each intermediate of on the dissociation of  $Cage-Al_{10}$  before and after protonation.

**Table S1.** Sample composition of  $\epsilon$ -Al<sub>13</sub>-Cl with different HCl concentrations.

| sample               | $\epsilon$ -Al <sub>13</sub> -Cl               | $\epsilon$ -Al <sub>13</sub> -Cl-<br>0M                                  | $\epsilon$ -Al <sub>13</sub> -Cl-<br>2M                           | $\epsilon$ -Al <sub>13</sub> -Cl-<br>3M                           | $\epsilon$ -Al <sub>13</sub> -Cl-<br>4M                           | $\epsilon$ -Al <sub>13</sub> -Cl-<br>5M                           |
|----------------------|------------------------------------------------|--------------------------------------------------------------------------|-------------------------------------------------------------------|-------------------------------------------------------------------|-------------------------------------------------------------------|-------------------------------------------------------------------|
| concentration        | 5ml 0.5 M $\epsilon$ -<br>Al <sub>13</sub> -Cl | 5ml 0.5 M $\epsilon$ -<br>Al <sub>13</sub> -Cl<br>0.5ml H <sub>2</sub> O | 5ml 0.5 M $\epsilon$ -<br>Al <sub>13</sub> -Cl<br>0.5ml 2M<br>HCl | 5ml 0.5 M $\epsilon$ -<br>Al <sub>13</sub> -Cl<br>0.5ml 3M<br>HCl | 5ml 0.5 M $\epsilon$ -<br>Al <sub>13</sub> -Cl<br>0.5ml 4M<br>HCl | 5ml 0.5 M $\epsilon$ -<br>Al <sub>13</sub> -Cl<br>0.5ml 5M<br>HCl |
| aging<br>duration    | 3 h                                            | 3 h                                                                      | 3 h                                                               | 3 h                                                               | 3 h                                                               | 3 h                                                               |
| aging<br>temperature | 40 °C                                          | 40 °C                                                                    | 40 °C                                                             | 40 °C                                                             | 40 °C                                                             | 40 °C                                                             |

**Table S2.** Sample composition of  $\epsilon$ -Al<sub>13</sub>-Cl under different titration rates.

| sample            | $\epsilon$ -Al <sub>13</sub> -Cl-10uL      | $\epsilon$ -Al <sub>13</sub> -Cl-50uL      | $\epsilon$ -Al <sub>13</sub> -Cl-200uL     | $\epsilon$ -Al <sub>13</sub> -Cl-600uL     |
|-------------------|--------------------------------------------|--------------------------------------------|--------------------------------------------|--------------------------------------------|
| concentration     | 5ml 0.5 M $\epsilon$ -Al <sub>13</sub> -Cl |
| titration speed   | 0.5ml 2M HCl<br>10ul min <sup>-1</sup>     | 0.5ml 2M HCl<br>50ul min <sup>-1</sup>     | 0.5ml 2M HCl<br>200ul min <sup>-1</sup>    | 0.5ml 2M HCl<br>600ul min <sup>-1</sup>    |
| aging duration    | 3 h                                        | 3 h                                        | 3 h                                        | 3 h                                        |
| aging temperature | 40 °C                                      | 40 °C                                      | 40 °C                                      | 40 °C                                      |

**Table S3.** Aluminum species identified from ESI-MS

| Identified       | Assignments                                                    | Sim.  | Exp.( $\epsilon$ -Al <sub>13</sub> ) | Exp.( $\epsilon$ -Al <sub>13</sub> -HCl) | Exp.( $\epsilon$ -Al <sub>13</sub> -Cl-concentration) |
|------------------|----------------------------------------------------------------|-------|--------------------------------------|------------------------------------------|-------------------------------------------------------|
| Al <sub>13</sub> | Al <sub>13</sub> O <sub>23</sub> H <sub>9</sub> <sup>2+</sup>  | 362.9 | 361.6113                             |                                          | 361.6166                                              |
| Al <sub>13</sub> | Al <sub>13</sub> O <sub>22</sub> H <sub>7</sub> <sup>2+</sup>  | 355.0 | 355.6168                             | 355.6129                                 | 355.61                                                |
| Al <sub>4</sub>  | Al <sub>4</sub> O <sub>14</sub> H <sub>17</sub> <sup>+</sup>   | 349.0 | 349.6048                             | 349.6092                                 | 349.6156                                              |
| Al <sub>13</sub> | Al <sub>13</sub> O <sub>20</sub> H <sub>3</sub> <sup>2+</sup>  | 337.0 |                                      |                                          | 335.9371                                              |
| Al <sub>13</sub> | Al <sub>13</sub> O <sub>25</sub> H <sub>14</sub> <sup>3+</sup> | 255.0 | 255.4682                             | 254.9433                                 | 255.4683                                              |
| Al <sub>3</sub>  | Al <sub>3</sub> O <sub>10</sub> H <sub>12</sub> <sup>+</sup>   | 253.0 |                                      | 252.9365                                 |                                                       |
| Al <sub>13</sub> | Al <sub>13</sub> O <sub>32</sub> H <sub>29</sub> <sup>4+</sup> | 223.0 |                                      | 222.9612                                 |                                                       |
| Al <sub>13</sub> | Al <sub>13</sub> O <sub>18</sub> <sup>3+</sup>                 | 213.0 |                                      | 212.9327                                 |                                                       |
| Al <sub>10</sub> | Al <sub>10</sub> O <sub>19</sub> H <sub>11</sub> <sup>3+</sup> | 195.0 |                                      | 194.9611                                 | 194.9689                                              |
| Al <sub>13</sub> | Al <sub>13</sub> O <sub>35</sub> H <sub>37</sub> <sup>6+</sup> | 157.6 | 158.0053                             | 158.0026                                 | 158.0075                                              |
| Al <sub>10</sub> | Al <sub>10</sub> O <sub>26</sub> H <sub>27</sub> <sup>5+</sup> | 142.6 |                                      | 143.0398                                 | 143.0416                                              |
| Al <sub>13</sub> | Al <sub>13</sub> O <sub>33</sub> H <sub>34</sub> <sup>7+</sup> | 130.4 | 130.0054                             | 130.0377                                 | 130.0051                                              |
| Al <sub>2</sub>  | Al <sub>2</sub> O <sub>4</sub> H <sub>3</sub> <sup>+</sup>     | 121.0 |                                      | 120.0234                                 |                                                       |
| Al <sub>2</sub>  | Al <sub>2</sub> O <sub>3</sub> H <sup>+</sup>                  | 103.0 |                                      | 102.0128                                 |                                                       |

## Atomic coordinates

Al<sub>1</sub>

|    |             |             |             |
|----|-------------|-------------|-------------|
| O  | 1.46919900  | -0.52622400 | -1.09294000 |
| H  | 1.70495900  | -1.47067900 | -1.27508700 |
| O  | 1.19210100  | 1.00891500  | 1.09247400  |
| H  | 1.06021800  | 1.96980600  | 1.29852600  |
| O  | -0.27774100 | 1.53677300  | -1.09181200 |
| H  | 0.42375000  | 2.21240700  | -1.27243000 |
| O  | -1.46889300 | 0.52638700  | 1.09292600  |
| H  | -2.23324300 | -0.06932900 | 1.30226600  |
| O  | -1.19170000 | -1.00903300 | -1.09245200 |
| H  | -1.05980200 | -1.96980500 | -1.29904900 |
| O  | 0.27801200  | -1.53669800 | 1.09170600  |
| H  | -0.42339500 | -2.21251600 | 1.27216700  |
| Al | 0.00014400  | 0.00000400  | -0.00003000 |
| H  | 1.17621000  | -1.90181000 | 1.29977900  |
| H  | 2.23334900  | 0.06979700  | -1.30222300 |
| H  | 2.12792500  | 0.74012700  | 1.27278200  |
| H  | -1.17587900 | 1.90195800  | -1.30010700 |

|   |             |             |             |
|---|-------------|-------------|-------------|
| H | -1.70437700 | 1.47098300  | 1.27475500  |
| H | -2.12761800 | -0.74047700 | -1.27246500 |
| H | -3.02199000 | -2.07400100 | 1.28184100  |
| O | -3.46924500 | -1.19852300 | 1.28865700  |
| H | -4.08209800 | -1.19458100 | 2.03298400  |
| H | -2.59714900 | 3.49760300  | 1.84367800  |
| O | -1.99054500 | 3.12526100  | 1.19277000  |
| H | -2.44516800 | 3.13806400  | 0.32282500  |
| H | -3.94357700 | -0.54768500 | -0.32407100 |
| O | -3.70297700 | -0.15923700 | -1.19283500 |
| H | -4.32755700 | -0.49707200 | -1.84560700 |
| H | -3.30705200 | 1.57942900  | -1.28104900 |
| O | -2.77144700 | 2.40382000  | -1.28876100 |
| H | -3.07526600 | 2.93781000  | -2.03186800 |
| H | 3.02196800  | 2.07450800  | -1.28084800 |
| O | 3.46928200  | 1.19904100  | -1.28798400 |
| H | 4.08232900  | 1.19539400  | -2.03215100 |
| O | 1.99023200  | -3.12523400 | -1.19365300 |

|   |             |             |             |
|---|-------------|-------------|-------------|
| H | 2.59733700  | -3.49753100 | -1.84411500 |
| H | 2.44408900  | -3.13861300 | -0.32331500 |
| H | 4.32782600  | 0.49635200  | 1.84607700  |
| O | 3.70326700  | 0.15881600  | 1.19312500  |
| H | 3.94393800  | 0.54769900  | 0.32455400  |
| H | 3.07473900  | -2.93833400 | 2.03245700  |
| O | 2.77162400  | -2.40414800 | 1.28921900  |
| H | 3.30734100  | -1.57981700 | 1.28216400  |
| H | -1.00580600 | -4.13152400 | -2.03388500 |
| O | -0.69657200 | -3.60333500 | -1.28884700 |
| H | 0.28524900  | -3.65198800 | -1.28294500 |
| H | 1.73290500  | 3.99544200  | -1.84555400 |
| O | 1.71216400  | 3.28572100  | -1.19270800 |
| H | 1.49614200  | 3.68821200  | -0.32375500 |
| H | -1.49640900 | -3.68795600 | 0.32345500  |
| O | -1.71203400 | -3.28530300 | 1.19242000  |
| H | -1.73307500 | -3.99510600 | 1.84516900  |
| H | 1.00315500  | 4.13127100  | 2.03431200  |

O 0.69535500 3.60312100 1.28865300

H -0.28650300 3.65095900 1.28145300

Al<sub>2</sub>

O 1.85050700 -1.87299800 -0.12513800

O 2.81896800 0.23541900 -1.31876200

O 2.74334600 0.15465000 1.50621600

O 1.45950300 1.96630100 0.14578000

O 0.05673400 -0.21647400 1.18910600

O 0.00588600 -0.00205800 -1.11091400

O -1.63478700 -2.03419400 -0.09980300

O -2.70786600 0.07055700 -1.35759900

O -2.72337400 -0.18591600 1.48921800

O -1.63042400 1.83623700 0.35076700

Al 1.50624400 0.04035900 0.02461400

Al -1.44650600 -0.12472100 0.08479200

H 1.27084600 -2.39963200 -0.72509300

H 2.75165800 -2.23784900 -0.20495600

|   |             |             |             |
|---|-------------|-------------|-------------|
| H | 3.07041200  | -0.47865100 | -1.96546300 |
| H | 3.28126200  | 1.09405400  | -1.54410100 |
| H | 3.35631900  | -0.61470900 | 1.73026100  |
| H | 2.28884300  | 0.40948200  | 2.34021100  |
| H | 1.01557500  | 2.48288500  | -0.56179700 |
| H | 2.24434900  | 2.45698700  | 0.49040800  |
| H | -1.03043900 | 2.43752400  | -0.14862500 |
| H | -2.53682700 | 2.19727000  | 0.19713300  |
| H | -2.48399000 | 0.41983200  | 2.24231100  |
| H | -3.09453000 | -1.03706200 | 1.87702700  |
| H | -2.65269900 | 0.85032500  | -1.96439100 |
| H | -3.63346200 | -0.27127600 | -1.34494000 |
| H | -2.51149500 | -2.49629100 | -0.14858400 |
| H | -1.03585200 | -2.48464900 | -0.73589200 |
| H | 0.09302400  | 0.03540900  | 2.11590000  |
| H | -0.00268900 | 0.05202400  | -2.06804700 |
| O | -1.80681700 | 1.57241800  | 3.25317800  |
| H | -1.58128500 | 2.22787600  | 2.57855900  |

|   |             |             |             |
|---|-------------|-------------|-------------|
| H | -0.95602600 | 1.33334800  | 3.65108600  |
| O | -5.18704400 | -0.96368400 | -1.28978800 |
| H | -5.61407400 | -1.01994000 | -2.15467000 |
| H | -5.81145600 | -0.50274400 | -0.71434000 |
| O | -3.75511600 | -2.37048900 | 2.44137200  |
| H | -3.12715000 | -2.93136000 | 2.91095900  |
| H | -4.00934800 | -2.86923600 | 1.64014800  |
| O | -2.49074500 | 2.37821500  | -2.69008600 |
| H | -3.16287500 | 2.84792200  | -2.15753000 |
| H | -2.74377400 | 2.46330900  | -3.61700800 |
| O | -4.04257400 | -3.17287300 | -0.15096900 |
| H | -4.62817800 | -2.54440500 | -0.62168100 |
| H | -4.16313200 | -4.04164600 | -0.55070800 |
| O | -3.95912300 | 2.96148400  | -0.45719500 |
| H | -4.14142200 | 3.83586200  | -0.09011500 |
| H | -4.78327400 | 2.46461300  | -0.37559800 |
| O | 4.38531700  | -3.05158000 | -0.48239100 |
| H | 5.27009900  | -2.75437800 | -0.73414700 |

|   |             |             |             |
|---|-------------|-------------|-------------|
| H | 4.42533700  | -4.01691100 | -0.45484500 |
| O | 1.11948700  | 0.91849700  | 3.62379300  |
| H | 1.28979000  | 0.42463400  | 4.43717300  |
| H | 1.36465600  | 1.83307200  | 3.81935600  |
| O | 4.28107100  | -1.83994100 | 2.10444300  |
| H | 4.45115900  | -2.39651400 | 1.32499700  |
| H | 3.87630800  | -2.42351000 | 2.75717900  |
| O | 4.09543300  | 2.46622800  | -1.75070400 |
| H | 3.61304900  | 3.14084900  | -2.24226300 |
| H | 4.20631300  | 2.82453400  | -0.85084300 |
| O | 3.52105800  | -1.70693500 | -2.92794400 |
| H | 3.73903900  | -2.48176600 | -2.39040300 |
| H | 2.90990200  | -2.01205700 | -3.60746800 |
| O | 3.79858500  | 2.92022000  | 0.97361600  |
| H | 4.12196900  | 2.15757700  | 1.47280500  |
| H | 3.95043400  | 3.69803900  | 1.52376700  |
| O | -0.22689000 | 3.29734200  | -1.43143300 |
| H | -0.23504500 | 4.26078900  | -1.38959900 |

|   |             |             |             |
|---|-------------|-------------|-------------|
| H | -0.86480700 | 3.03493100  | -2.12770200 |
| O | 0.16549600  | -3.20489100 | -1.72041800 |
| H | 0.14304700  | -2.94594500 | -2.65065300 |
| H | 0.20077400  | -4.17020100 | -1.70487500 |

Al<sub>3</sub>

|    |             |             |             |
|----|-------------|-------------|-------------|
| Al | -1.86179200 | 0.67969100  | -0.05719000 |
| Al | 0.76444900  | -1.54765700 | -0.10707800 |
| Al | 1.58567600  | 1.20129700  | -0.05234400 |
| O  | 1.36583700  | -0.25214000 | 1.16130500  |
| O  | -1.01731700 | -0.97270900 | 0.01927200  |
| O  | 1.30971500  | -0.19142700 | -1.26820200 |
| O  | -0.25539900 | 1.62423200  | -0.02369400 |
| H  | -0.40915400 | 2.53511300  | 0.24566600  |
| H  | -1.54600500 | -1.63750300 | 0.49226900  |
| H  | 0.99222400  | -0.03225200 | -2.17088700 |
| H  | 2.14836300  | -0.50755600 | 1.65677700  |
| O  | -3.61178000 | -0.21257600 | -0.16628100 |

|   |             |             |             |
|---|-------------|-------------|-------------|
| H | -4.43461900 | 0.25972300  | 0.11183300  |
| O | -2.12803400 | 0.81436800  | 1.83307400  |
| H | -2.93899900 | 0.41814700  | 2.25050200  |
| O | -2.79219300 | 2.37253300  | -0.19647600 |
| H | -2.84231700 | 2.85208800  | -1.05353600 |
| O | -1.95367800 | 0.65482000  | -2.00494100 |
| H | -2.58198600 | -0.00837600 | -2.37254300 |
| O | 0.39508800  | -2.86650400 | 1.24134000  |
| H | 0.33176800  | -3.84057400 | 1.08665500  |
| O | 0.23823700  | -2.77188000 | -1.49750600 |
| H | 0.75712000  | -3.57714800 | -1.73116900 |
| O | 2.55088900  | -2.31515600 | -0.21650000 |
| H | 2.82200600  | -3.22025400 | 0.06443500  |
| O | 1.83716700  | 2.60087300  | -1.32626500 |
| H | 2.73823800  | 2.96789400  | -1.54659200 |
| O | 3.50116200  | 0.93793900  | -0.17524900 |
| H | 4.17983900  | 1.15124500  | 0.51642200  |
| O | 1.92709700  | 2.46999400  | 1.35334300  |

|   |             |             |             |
|---|-------------|-------------|-------------|
| H | 2.46618800  | 3.28367300  | 1.21623300  |
| H | -0.71799300 | -2.96049400 | -1.66803600 |
| H | 3.16858900  | -1.96964900 | -0.89619100 |
| H | 0.46993000  | -2.67180000 | 2.20556400  |
| H | 3.84497200  | 0.27519900  | -0.80923900 |
| H | 1.14909300  | 2.97247000  | -1.92339500 |
| H | 1.94557800  | 2.22470400  | 2.30809200  |
| H | -3.63777700 | -1.13920900 | 0.18043100  |
| H | -1.14694600 | 0.63514000  | -2.57797800 |
| H | -3.32737300 | 2.81267000  | 0.49975900  |
| H | -1.38569500 | 0.69266700  | 2.50233600  |
| O | -2.64851200 | 3.43373500  | -2.66639500 |
| H | -2.94996700 | 2.68070800  | -3.19267900 |
| H | -3.17331800 | 4.19273600  | -2.95172300 |
| O | 1.91946600  | 1.84297500  | 3.94976900  |
| H | 1.93955900  | 2.60229000  | 4.54617700  |
| H | 2.60921900  | 1.24311500  | 4.26060100  |
| O | -4.31400300 | -0.26851900 | 2.88786900  |

|   |             |             |             |
|---|-------------|-------------|-------------|
| H | -5.05676800 | 0.10171200  | 2.37467300  |
| H | -4.47496200 | -0.02202300 | 3.80532500  |
| O | 4.20073900  | 3.69352000  | -1.61829300 |
| H | 4.89207700  | 3.02329700  | -1.57181600 |
| H | 4.18831100  | 4.11465900  | -0.73822800 |
| O | -4.50145300 | 3.35468000  | 1.63990400  |
| H | -4.84597100 | 4.24790800  | 1.51545600  |
| H | -4.23343400 | 3.29647000  | 2.56595000  |
| O | 0.06700900  | 3.38861100  | -3.17322100 |
| H | -0.88262500 | 3.54021300  | -2.97633400 |
| H | 0.35035800  | 4.09808200  | -3.76135300 |
| O | 0.17525100  | 0.72223100  | -3.59692300 |
| H | 0.07491700  | 0.34236600  | -4.47673200 |
| H | 0.24685700  | 1.69691900  | -3.69542100 |
| O | -3.64802100 | -1.23096000 | -2.97517900 |
| H | -4.47444800 | -1.09339700 | -2.49368300 |
| H | -3.87255500 | -1.20603500 | -3.91405900 |
| O | -5.72915300 | 1.01297100  | 0.91405100  |

|   |             |             |             |
|---|-------------|-------------|-------------|
| H | -6.62987500 | 0.97773700  | 0.57422800  |
| H | -5.52797200 | 1.94479100  | 1.13512300  |
| O | -3.09010900 | -2.67772400 | 0.60909300  |
| H | -2.94677300 | -3.20604700 | -0.20386800 |
| H | -3.46978700 | -3.24581400 | 1.28677000  |
| O | 5.34802900  | 1.53945500  | 1.59545200  |
| H | 5.07054100  | 1.74132700  | 2.49632000  |
| H | 5.89635800  | 2.28403200  | 1.32230700  |
| O | 4.13409100  | -1.01040100 | -1.97085200 |
| H | 5.02950200  | -1.27118800 | -2.21917400 |
| H | 3.65948700  | -0.83005400 | -2.79216300 |
| O | 3.11467100  | -4.87537100 | 0.32323000  |
| H | 2.39435300  | -5.29268400 | 0.82953400  |
| H | 3.94975900  | -5.19179600 | 0.68467900  |
| O | 0.55480400  | -2.23413100 | 3.82711800  |
| H | 0.04599000  | -2.80594400 | 4.41624000  |
| H | 1.45226200  | -2.22231400 | 4.18414700  |
| O | 1.45932500  | -5.13034000 | -1.83522500 |

|                 |             |             |             |
|-----------------|-------------|-------------|-------------|
| H               | 1.51862100  | -5.61052600 | -2.66832900 |
| H               | 2.32843300  | -5.18701600 | -1.39658900 |
| O               | -2.34164200 | -3.38260400 | -1.89050000 |
| H               | -2.48498800 | -4.21951500 | -2.34764600 |
| H               | -2.82730900 | -2.69437800 | -2.39592800 |
| O               | -0.49035400 | 0.40183200  | 3.77554200  |
| H               | 0.30428500  | 0.95823800  | 3.85271300  |
| H               | -0.15121000 | -0.51081200 | 3.75559000  |
| O               | 0.46477500  | -5.46740300 | 0.69809900  |
| H               | -0.12910000 | -6.12095700 | 1.08324500  |
| H               | 0.48688600  | -5.61766800 | -0.26602500 |
| O               | 3.48182200  | 4.63879200  | 0.91758100  |
| H               | 4.12678500  | 4.80019300  | 1.61840800  |
| H               | 2.98494400  | 5.46241800  | 0.82810300  |
| Al <sub>7</sub> |             |             |             |
| Al              | 0.02550900  | 0.03545200  | 0.01258200  |
| Al              | -1.01714200 | -2.83689900 | 0.01501500  |

|    |             |             |             |
|----|-------------|-------------|-------------|
| Al | 1.98860800  | -2.29834100 | -0.04099800 |
| Al | 3.04223300  | 0.56358200  | 0.01764700  |
| Al | 1.06172700  | 2.89698600  | -0.00311300 |
| Al | -1.94029900 | 2.37625400  | -0.00906500 |
| Al | -2.99957500 | -0.50074600 | 0.02708400  |
| O  | 1.57792700  | -0.52258300 | 0.96190700  |
| O  | -1.53311200 | 0.60460300  | -0.93303700 |
| O  | -1.23315600 | -1.03606100 | 0.95991600  |
| O  | 0.30425700  | -1.57693700 | -0.96438300 |
| O  | 1.28435800  | 1.10826400  | -0.93742700 |
| O  | -0.25706600 | 1.66056100  | 0.96574300  |
| O  | 0.61408000  | -3.24073100 | 0.72625800  |
| O  | 3.11752400  | -1.08122500 | -0.79889000 |
| O  | 2.58949200  | 2.19324500  | 0.75922800  |
| O  | -0.55907800 | 3.31748400  | -0.74527600 |
| O  | -3.06753000 | 1.17049300  | 0.82382000  |
| O  | -2.50821200 | -2.09172500 | -0.78467900 |
| H  | 1.60845400  | -0.56163400 | 1.92722600  |

|   |             |             |             |
|---|-------------|-------------|-------------|
| H | -1.57294100 | 0.59612600  | -1.89796800 |
| H | -1.26172600 | -1.04579600 | 1.92549500  |
| H | 0.29511300  | -1.60058700 | -1.93025800 |
| H | 1.32582200  | 1.13348700  | -1.90253400 |
| H | -0.27137100 | 1.70344400  | 1.93086800  |
| H | 0.82172200  | -3.89960300 | 1.42587300  |
| H | 3.51713500  | -1.13149300 | -1.69636800 |
| H | 3.02342600  | 2.62337500  | 1.50898600  |
| H | -0.59900300 | 3.99053600  | -1.46091800 |
| H | -3.56113900 | 1.40398900  | 1.62105600  |
| H | -2.92280700 | -2.49782400 | -1.55839900 |
| O | 4.11897600  | 1.29881000  | -1.34047700 |
| H | 4.44544100  | 2.23198900  | -1.36077100 |
| H | 4.51329600  | 0.74087300  | -2.04423000 |
| O | 1.94656200  | 3.83146400  | -1.37124100 |
| H | 1.44461800  | 4.30158800  | -2.07485400 |
| H | 2.91578800  | 4.02032700  | -1.39213400 |
| O | -3.13380900 | 2.92605700  | -1.33906800 |

|   |             |             |             |
|---|-------------|-------------|-------------|
| H | -4.10754500 | 2.77423100  | -1.26381100 |
| H | -2.87528900 | 3.14638900  | -2.27360000 |
| O | -4.29049300 | -0.12640400 | -1.24690100 |
| H | -4.50726700 | -0.68427100 | -2.06236300 |
| H | -4.92014400 | 0.62506900  | -1.14862000 |
| O | -4.04923000 | -1.27919200 | 1.33962000  |
| H | -4.36005200 | -0.82989700 | 2.19145200  |
| H | -4.39341900 | -2.19969300 | 1.27153000  |
| O | -1.92852300 | -3.78364200 | 1.34509500  |
| H | -2.90132400 | -3.95495700 | 1.30478100  |
| H | -1.58127200 | -3.92410700 | 2.26606500  |
| O | -0.95608100 | -4.16733500 | -1.30069100 |
| H | -0.32783600 | -4.93095900 | -1.27604600 |
| H | -1.70750000 | -4.31712700 | -1.91674300 |
| O | 2.38574400  | -3.58502200 | -1.34252100 |
| H | 3.24763000  | -3.60524800 | -1.84086700 |
| H | 2.00121900  | -4.49417400 | -1.29530200 |
| O | -2.33429100 | 3.65963400  | 1.29334600  |

|   |             |             |             |
|---|-------------|-------------|-------------|
| H | -1.98198600 | 4.58372200  | 1.28766100  |
| H | -3.05670000 | 3.53681200  | 1.94924800  |
| O | 0.98847700  | 4.22254500  | 1.31717400  |
| H | 1.70133600  | 4.33622600  | 1.98459700  |
| H | 0.34645000  | 4.97554200  | 1.31694900  |
| O | 3.14992400  | -2.85421800 | 1.32981000  |
| H | 2.84981700  | -3.50038100 | 2.00877800  |
| H | 4.13125800  | -2.73384500 | 1.32250200  |
| O | 4.33669600  | 0.22201200  | 1.30135900  |
| H | 4.92622200  | -0.56746600 | 1.24812600  |
| H | 4.80073400  | 0.97061500  | 1.79767400  |
| O | 4.47912100  | -0.76712900 | -3.04971400 |
| H | 4.02022900  | -0.68049600 | -3.89429000 |
| H | 4.91780300  | -1.63820900 | -3.06559600 |
| O | 5.42651100  | 2.19519800  | 2.51635300  |
| H | 6.11399700  | 2.65825400  | 2.02281800  |
| H | 4.81271700  | 2.87839700  | 2.83033700  |
| O | -5.65650600 | 2.15944600  | -0.98040800 |

|   |             |             |             |
|---|-------------|-------------|-------------|
| H | -6.04450300 | 2.35570700  | -0.11695000 |
| H | -6.32991800 | 2.37823800  | -1.63842800 |
| O | -4.58059300 | -3.89124500 | 1.13302300  |
| H | -5.09330600 | -4.31605500 | 1.83376600  |
| H | -4.93913100 | -4.21675600 | 0.29646600  |
| O | -0.83072700 | -4.03888400 | 3.75845200  |
| H | -1.22266500 | -4.73956500 | 4.29749400  |
| H | -0.94198200 | -3.22497400 | 4.26866500  |
| O | 1.05353600  | -5.89748900 | -1.15808900 |
| H | 1.16377000  | -6.39391900 | -0.33544000 |
| H | 1.16993800  | -6.53376900 | -1.87677800 |
| O | 4.60070400  | 3.90385000  | -1.25360200 |
| H | 5.11093800  | 4.32121000  | -1.96099700 |
| H | 4.97040200  | 4.22913900  | -0.42150300 |
| O | -0.06463400 | 4.88762700  | -2.80727800 |
| H | -0.23004800 | 5.83769600  | -2.83237400 |
| H | -0.67420400 | 4.47395600  | -3.44871100 |
| O | 5.67550200  | -2.09356400 | 1.17826200  |

|   |             |             |             |
|---|-------------|-------------|-------------|
| H | 6.15453000  | -2.29081300 | 0.36241700  |
| H | 6.28326500  | -2.28453000 | 1.90549100  |
| O | 1.66748400  | -4.61213400 | 2.71406400  |
| H | 0.97298700  | -4.45558600 | 3.38276200  |
| H | 1.83691600  | -5.56151100 | 2.69625200  |
| O | 3.17945100  | 4.02909100  | 2.91518400  |
| H | 3.65094300  | 4.87441200  | 2.91123100  |
| H | 2.90664700  | 3.88389400  | 3.83241900  |
| O | -1.01453000 | 5.96226600  | 1.21342000  |
| H | -1.12733800 | 6.58556300  | 1.94424200  |
| H | -1.08865500 | 6.48021000  | 0.40010600  |
| O | -4.29400100 | 2.75123800  | 2.93642200  |
| H | -4.04736500 | 2.99292000  | 3.84063500  |
| H | -5.13641500 | 3.19659500  | 2.76686100  |
| O | -4.76782900 | -0.07941100 | 3.47349600  |
| H | -4.20328600 | -0.26064800 | 4.23444300  |
| H | -4.82464400 | 0.88773700  | 3.40999100  |
| O | 4.69281500  | -3.50958000 | -2.66523900 |

|   |             |             |             |
|---|-------------|-------------|-------------|
| H | 4.63328300  | -3.98522300 | -3.50501200 |
| H | 5.42648600  | -3.91984400 | -2.18787300 |
| O | -3.19703000 | -4.01373200 | -2.82570800 |
| H | -3.81794400 | -4.72846600 | -2.62500300 |
| H | -2.93732800 | -4.14144900 | -3.74929100 |
| O | -2.24873500 | 3.48090900  | -3.79085800 |
| H | -2.08362400 | 2.67064800  | -4.29185800 |
| H | -2.86487600 | 3.99792500  | -4.32746700 |
| O | -4.77866300 | -1.57364600 | -3.29534900 |
| H | -4.47081700 | -2.49152000 | -3.23231500 |
| H | -4.40927200 | -1.22946800 | -4.11749800 |

**Al<sub>10</sub>**

|    |             |             |             |
|----|-------------|-------------|-------------|
| Al | -2.77318500 | 1.18329400  | -1.52043200 |
| Al | -0.24508500 | 2.65424500  | -1.44860100 |
| Al | 2.30532000  | 1.26674900  | -0.84764900 |
| Al | 4.62042700  | -0.03180400 | 0.58435200  |
| Al | -1.91654000 | 2.56634400  | 0.90808000  |

|    |             |             |             |
|----|-------------|-------------|-------------|
| Al | 2.31490900  | -1.61994800 | -0.36855500 |
| Al | -2.80031900 | -1.77648100 | -0.84672900 |
| Al | -1.83603700 | -2.35302600 | 1.82872300  |
| Al | -0.24659000 | -3.20071500 | -0.39558900 |
| Al | -0.24836100 | -0.24248100 | -0.78124000 |
| O  | -3.42836800 | -2.32741000 | 0.86410400  |
| O  | -1.79675000 | -3.23281800 | -1.42326700 |
| O  | 1.38462900  | -2.95414900 | 0.49734200  |
| O  | 0.68384200  | -1.85046900 | -1.54571900 |
| O  | -2.61704500 | 1.28235300  | 2.11965900  |
| O  | 3.57783400  | -1.44420100 | 1.01341600  |
| O  | 3.66985000  | 1.49171000  | 0.44511400  |
| O  | 6.07832500  | -0.55293000 | -0.26702400 |
| O  | 3.34922400  | -0.26764900 | -1.28367500 |
| O  | 1.29423600  | 2.75539400  | -0.35870500 |
| O  | 0.71671400  | 1.02397500  | -2.05362400 |
| O  | -1.12646800 | 3.87335300  | -0.30823100 |
| O  | -3.36289100 | 2.45391200  | -0.28903400 |

|   |             |             |             |
|---|-------------|-------------|-------------|
| O | -1.70834000 | 2.33137600  | -2.54938300 |
| O | -3.67988500 | -0.17410400 | -0.67592400 |
| O | -1.75934800 | -0.48875800 | -2.04533200 |
| O | 1.34906500  | -0.07344400 | 0.10948200  |
| O | -2.73490200 | -3.29981800 | 3.28457000  |
| O | 0.39426700  | -4.74463700 | -1.23505900 |
| O | 3.26601600  | -2.88297400 | -1.45646500 |
| O | 0.43324800  | 3.85286800  | -2.75227200 |
| O | -4.22504200 | -2.41219500 | -1.93552900 |
| O | -1.02925200 | -3.85636500 | 1.18698700  |
| O | 0.88594900  | 0.43542200  | 2.61139500  |
| O | -1.15751200 | -1.54802600 | 0.21911700  |
| O | -1.16992400 | 1.31867000  | -0.34512400 |
| O | 5.30701000  | 0.42804200  | 2.28538800  |
| O | -4.03128000 | 1.28533600  | -2.92070500 |
| O | -2.69319100 | 3.99490500  | 1.91613100  |
| O | -0.26652100 | 2.58700700  | 1.90948800  |
| O | -1.04917300 | -1.28685900 | 2.98983000  |

|   |             |             |             |
|---|-------------|-------------|-------------|
| H | -3.11712200 | -2.70576300 | 3.98520200  |
| H | -0.22443300 | -5.44211900 | -1.62923300 |
| H | 4.09085000  | -2.59650800 | -1.93215000 |
| H | -0.26426900 | 4.37770000  | -3.23922000 |
| H | 1.27524100  | -5.12641800 | -0.98298500 |
| H | 3.31116500  | -3.83502600 | -1.17172600 |
| H | -3.44030300 | -3.92526500 | 2.97690400  |
| H | 4.61754800  | 0.88469200  | 2.85052200  |
| H | -0.76965900 | -4.64066300 | 1.68815900  |
| H | -3.96367300 | -3.15100700 | 0.96633600  |
| H | -2.15246200 | -3.95901800 | -1.95887300 |
| H | -4.11657600 | -3.20388900 | -2.51582500 |
| H | -1.65851100 | 2.26053800  | -3.51199300 |
| H | -4.27044100 | 2.73625900  | -0.11884500 |
| H | -1.85354100 | 4.31233800  | -0.78068500 |
| H | 0.84808400  | 0.88349500  | -3.00521600 |
| H | 0.99418600  | 2.84245600  | 0.57268100  |
| H | 1.19149400  | 4.43443400  | -2.47671300 |

|   |             |             |             |
|---|-------------|-------------|-------------|
| H | -3.50615600 | 0.84454300  | 2.02813700  |
| H | -4.30009500 | -0.00012000 | 0.06126400  |
| H | -1.60681200 | -0.72403900 | -2.97464600 |
| H | 1.43543100  | -3.02713000 | 1.46061400  |
| H | 0.77548000  | -2.05085700 | -2.49113400 |
| H | 6.41843400  | -1.35111600 | 0.19278000  |
| H | 3.46655500  | 1.92894500  | 1.30653100  |
| H | 3.82884700  | -0.46039000 | -2.11131900 |
| H | 4.17141600  | -2.21145500 | 1.21722200  |
| H | -4.92521700 | -1.78883100 | -2.27511700 |
| H | -4.85327000 | 0.73305100  | -2.88105900 |
| H | -4.20352800 | 2.22119300  | -3.27309600 |
| H | -2.82247000 | 3.85067800  | 2.89489200  |
| H | -2.28583500 | 1.11432400  | 3.04664600  |
| H | 0.12871800  | 1.69337400  | 2.24851200  |
| H | -0.13002500 | 3.27724800  | 2.63220200  |
| H | -1.10543400 | -1.58556500 | 3.90785700  |
| H | 1.14731800  | 0.16146300  | 1.67947400  |

|   |             |             |             |
|---|-------------|-------------|-------------|
| H | 0.20235700  | -0.25522000 | 2.86724900  |
| H | -2.19203400 | 4.87131200  | 1.81166900  |
| H | 5.80525900  | -0.24580100 | 2.83508900  |
| O | -2.54383900 | 3.69545700  | 4.57029900  |
| H | -3.15101500 | 4.15977000  | 5.16865400  |
| H | -2.54460100 | 2.74188700  | 4.83305500  |
| O | -0.09399800 | 4.46541600  | 3.73091100  |
| H | 0.67764900  | 4.45473900  | 4.32027300  |
| H | -0.89385300 | 4.28645200  | 4.28830300  |
| O | -3.54679100 | -1.37377100 | 5.03807600  |
| H | -3.56829800 | -1.68779500 | 5.95970300  |
| H | -4.47262600 | -1.15605700 | 4.82868900  |
| O | -3.48435100 | -4.76306700 | -3.15416500 |
| H | -3.40409900 | -4.67113400 | -4.12052300 |
| H | -4.22992900 | -5.37437900 | -3.01465300 |
| O | -4.24882600 | 3.77600500  | -3.68110600 |
| H | -3.34161000 | 4.15191500  | -3.73938000 |
| H | -4.66594300 | 4.26047000  | -2.95009000 |

|   |             |             |             |
|---|-------------|-------------|-------------|
| O | 5.83229500  | -2.84452800 | 1.31214800  |
| H | 6.19144300  | -2.68862800 | 2.21406000  |
| H | 6.03369900  | -3.76420900 | 1.07876200  |
| O | 7.10308400  | 1.82458400  | -0.99162800 |
| H | 8.04027300  | 1.95075600  | -1.20929700 |
| H | 7.02761900  | 0.89852700  | -0.66168000 |
| O | -1.65701500 | 5.01989700  | -3.97492000 |
| H | -1.78778700 | 5.93325700  | -3.66456300 |
| H | -1.51708400 | 5.10262600  | -4.93480700 |
| O | 2.62213900  | 4.79510900  | -1.61673100 |
| H | 2.34103400  | 4.55867400  | -0.71238700 |
| H | 3.10201900  | 5.63822000  | -1.56969300 |
| O | -1.02294800 | 5.98249000  | 1.60511900  |
| H | -0.46893300 | 5.71911600  | 2.37230600  |
| H | -0.62525300 | 5.52008100  | 0.84083100  |
| O | 2.92321000  | -5.38039500 | -0.59829000 |
| H | 3.06731500  | -5.46771900 | 0.35974700  |
| H | 3.37118300  | -6.13972400 | -1.00945500 |

|   |             |             |             |
|---|-------------|-------------|-------------|
| O | -1.30348900 | -6.45699500 | -2.21835700 |
| H | -1.72682700 | -6.94738200 | -1.49445300 |
| H | -2.04031300 | -6.01695900 | -2.68958300 |
| O | -5.98766900 | -0.56136600 | -2.74093400 |
| H | -6.49223600 | -0.74825700 | -3.55175000 |
| H | -6.65303500 | -0.39966100 | -2.04942100 |
| O | 5.29124700  | -1.50268300 | -2.62514300 |
| H | 5.80095300  | -1.24454700 | -1.80614500 |
| H | 5.90393200  | -1.94655100 | -3.23454100 |
| O | 6.55897600  | -1.53173600 | 3.58147500  |
| H | 7.50327100  | -1.37222800 | 3.75214200  |
| H | 6.16851500  | -1.74103400 | 4.44745500  |
| O | -4.50497900 | -4.63325200 | 1.75899200  |
| H | -5.44934000 | -4.74081300 | 1.96167700  |
| H | -4.21623600 | -5.47691500 | 1.37240200  |
| O | 3.18376400  | 1.74962100  | 3.08131100  |
| H | 3.12588200  | 2.47617400  | 3.72192700  |
| H | 2.35279500  | 1.21352300  | 3.16580600  |

|   |             |             |             |
|---|-------------|-------------|-------------|
| O | -2.15366700 | 1.02454100  | 4.72203800  |
| H | -2.67783100 | 0.22189200  | 4.96400300  |
| H | -1.25958700 | 0.87576000  | 5.07096000  |
| O | -4.82719300 | -0.13003900 | 1.73777600  |
| H | -5.70498500 | -0.06036900 | 2.14625100  |
| H | -4.58035600 | -1.07954600 | 1.69222000  |
| O | 3.17428100  | 2.23868600  | -2.23034500 |
| H | 4.08472400  | 1.92206500  | -2.58219800 |
| H | 3.19601000  | 3.22057500  | -2.10893300 |
| O | 5.45980200  | 1.43489100  | -3.08993400 |
| H | 5.50484900  | 0.46852900  | -3.22056600 |
| H | 6.13627900  | 1.63570400  | -2.38426600 |

 $\epsilon\text{-Al}_{13}$ 

|    |             |             |             |
|----|-------------|-------------|-------------|
| Al | -0.13685700 | 3.37198600  | 0.17938500  |
| Al | -2.94200000 | -1.87018800 | -0.08500300 |
| Al | 1.93900600  | 2.27822500  | -1.54886200 |
| Al | -0.73797700 | -2.80117700 | -1.81802000 |
| Al | -0.90195700 | 2.13110500  | -2.35169800 |

|    |             |             |             |
|----|-------------|-------------|-------------|
| Al | 2.03981000  | -2.66511800 | -1.00407400 |
| Al | 3.40408600  | -0.10211500 | -0.79165000 |
| Al | -2.26131700 | -0.44178600 | -2.53887200 |
| Al | 2.63663300  | -1.55956000 | 1.60950000  |
| Al | -2.25534900 | -0.62334100 | 2.44290600  |
| Al | -0.84041000 | 1.95956000  | 2.61293700  |
| Al | 0.50360200  | -0.56573300 | 3.28777600  |
| Al | 0.05047700  | -0.08386700 | -0.01827000 |
| O  | -1.61770100 | 2.80556400  | 1.15805900  |
| O  | -2.44912400 | 1.12315800  | 3.14950500  |
| O  | 0.64650200  | 2.70200300  | 1.76443200  |
| O  | -1.15423100 | -1.23833500 | 3.79617500  |
| O  | 2.18220000  | -0.01469500 | 2.60133800  |
| O  | -1.18995200 | 3.64786700  | -1.31847100 |
| O  | 1.03046700  | -2.13745200 | 2.40399000  |
| O  | -0.89404100 | 0.53002700  | -3.30373200 |
| O  | 2.57667000  | 0.67376600  | -2.26025000 |
| O  | -2.45510300 | 1.24844000  | -1.64222700 |

|   |             |             |             |
|---|-------------|-------------|-------------|
| O | 4.09317800  | -0.68214900 | 0.83080700  |
| O | 3.51853900  | -1.75289700 | -1.66072000 |
| O | 2.92182600  | 1.56671400  | -0.09630700 |
| O | 2.82988400  | -3.13393200 | 0.63860300  |
| O | 0.93053000  | -2.16138700 | -2.42582300 |
| O | 0.79727600  | 2.59750800  | -2.99998800 |
| O | 0.40989500  | -3.43654700 | -0.44300400 |
| O | -1.65050000 | -2.04292100 | -3.25256400 |
| O | -3.67759200 | -1.21259800 | -1.63846900 |
| O | 1.45227800  | 3.80184700  | -0.63480800 |
| O | -2.25165100 | -3.40074200 | -0.88273400 |
| O | -3.19508400 | -0.21332000 | 0.83356400  |
| O | -2.22081000 | -2.25884200 | 1.57135600  |
| O | 1.69295100  | -0.93977200 | -0.03032500 |
| O | -0.27514600 | 5.22267200  | 0.75864800  |
| O | 3.42980800  | 3.26188300  | -2.30282700 |
| O | -1.87401700 | 3.01283200  | -3.78237600 |
| O | -1.11594600 | 3.45363700  | 3.83867200  |

|   |             |             |             |
|---|-------------|-------------|-------------|
| O | 5.18639300  | 0.46724400  | -1.32347500 |
| O | -3.49275000 | -0.07014200 | -3.99230600 |
| O | 1.25463700  | -1.11620400 | 5.00602000  |
| O | 3.75969800  | -2.31658800 | 3.02278000  |
| O | 2.65568200  | -4.30145300 | -1.87436200 |
| O | -0.58487400 | -4.46898800 | -2.82174200 |
| O | -4.63533800 | -2.66269200 | 0.35699500  |
| O | -3.89513600 | -1.07248300 | 3.41451400  |
| O | 0.10787800  | 1.13046100  | 3.96860500  |
| O | 0.19615700  | 1.56322900  | -0.80294500 |
| O | -0.53050900 | 0.12862000  | 1.72462300  |
| O | -1.18998900 | -1.10892100 | -0.91507000 |
| H | -0.89418100 | 5.52289400  | 1.45746200  |
| H | 4.05715400  | 2.84053900  | -2.92679000 |
| H | -2.02381900 | 2.59635300  | -4.65835800 |
| H | -1.55818300 | 4.27492100  | 3.52487800  |
| H | 5.34348100  | 0.82458000  | -2.22662000 |
| H | -4.45508300 | -0.05038700 | -3.80481700 |

|   |             |             |             |
|---|-------------|-------------|-------------|
| H | 0.63893400  | -0.89874800 | 5.74591800  |
| H | 4.53789100  | -2.80242100 | 2.68293400  |
| H | 2.18105000  | -5.13457900 | -1.66138300 |
| H | -0.25352000 | -5.28033200 | -2.38335600 |
| H | -5.41031200 | -2.65852600 | -0.24868400 |
| H | -4.27431800 | -1.97330000 | 3.30950200  |
| H | 2.16794300  | -0.83253500 | 5.22331700  |
| H | 4.02950000  | -1.71520400 | 3.75373500  |
| H | -1.49152600 | 3.17384000  | 4.70065200  |
| H | 0.51683100  | 5.79882600  | 0.69342000  |
| H | -1.87374600 | 3.99198600  | -3.83143000 |
| H | -3.25189100 | 0.49511400  | -4.75744600 |
| H | 0.95117500  | 3.31553000  | -3.61613700 |
| H | -1.21384900 | 4.51527900  | -1.74860300 |
| H | 2.03367500  | 4.46374500  | -0.23371100 |
| H | 1.36307500  | 3.15301400  | 2.21342900  |
| H | -2.49311900 | 2.77932900  | 0.77255400  |
| H | 0.70908400  | 1.62240600  | 4.53091200  |

|   |             |             |             |
|---|-------------|-------------|-------------|
| H | -3.30289100 | 1.52121100  | 2.91045200  |
| H | -1.37840300 | -1.11603400 | 4.73338400  |
| H | -4.60576300 | -0.41461700 | 3.25281300  |
| H | -4.84801300 | -3.06761000 | 1.22486300  |
| H | -2.83866800 | -4.08847400 | -1.20158000 |
| H | -4.53139900 | -0.75712300 | -1.69329600 |
| H | -2.23954800 | -2.60392700 | -3.77756800 |
| H | 0.18765600  | -3.28724900 | 0.48298900  |
| H | 1.19322000  | -2.33969900 | -3.33136400 |
| H | -1.29347400 | -4.66651000 | -3.47280200 |
| H | 3.62841100  | -4.43514500 | -1.82057900 |
| H | 3.66431600  | -3.60789600 | 0.70231600  |
| H | 4.34632300  | -2.25195700 | -1.72085400 |
| H | 5.00294900  | -0.98794400 | 0.87528500  |
| H | -0.16120800 | 0.13468000  | -3.77538700 |
| H | -3.26877100 | 1.74953800  | -1.75010500 |
| H | -2.91406900 | 0.50255900  | 0.24259900  |
| H | -1.84325400 | -3.07258400 | 1.90452500  |

|   |             |             |             |
|---|-------------|-------------|-------------|
| H | 2.21974600  | 0.81643900  | 2.10873200  |
| H | 0.99903400  | -2.97155200 | 2.87916400  |
| H | 2.16455700  | 0.13672500  | -2.93777300 |
| H | 3.55122900  | 2.10807400  | 0.38335900  |
| H | 3.38548700  | 4.23632000  | -2.42107800 |
| H | 5.96833400  | 0.00581600  | -0.97202600 |
| H | -3.00417700 | 2.03716800  | 6.26229800  |
| O | -2.19503800 | 1.84165200  | 5.77480300  |
| H | -2.47344800 | 1.42914100  | 4.92754000  |
| H | 3.52530400  | 0.28691400  | 4.06217500  |
| O | 3.81187900  | -0.31222100 | 4.77365500  |
| H | 4.47387700  | 0.14235000  | 5.30678000  |
| H | -1.24787700 | -0.90302900 | 7.25970700  |
| O | -0.90817500 | -0.50905600 | 6.44922400  |
| H | -1.28024700 | 0.39758400  | 6.38858300  |
| O | 5.66683000  | -3.53203900 | 1.35997500  |
| H | 6.29283000  | -2.81482000 | 1.14220300  |
| H | 6.18546100  | -4.23050300 | 1.77978100  |

|   |             |             |             |
|---|-------------|-------------|-------------|
| H | -4.38651800 | -4.28522800 | 3.13089100  |
| O | -4.93971400 | -3.52982600 | 2.89328200  |
| H | -5.81728900 | -3.71654300 | 3.25139500  |
| H | -4.84179500 | 0.68470200  | 1.46944700  |
| O | -5.10857200 | 1.04089600  | 2.33524900  |
| H | -5.97213200 | 1.45499100  | 2.23504600  |
| H | -7.53599200 | -2.56148600 | -1.08958200 |
| O | -6.65226600 | -2.55965800 | -1.48075700 |
| H | -6.61932100 | -3.34704700 | -2.04038700 |
| H | 0.71466600  | -6.93050200 | -0.75428000 |
| O | 0.76081500  | -6.04822200 | -1.13923800 |
| H | 0.51979900  | -5.40035800 | -0.45257300 |
| H | -2.57926100 | -4.42898800 | -5.44537000 |
| O | -2.68679400 | -4.31468100 | -4.49320300 |
| H | -3.52825600 | -4.73071200 | -4.26970000 |
| H | 5.55710000  | -4.01979500 | -0.54801000 |
| O | 5.28306300  | -3.91795800 | -1.47660300 |
| H | 6.00974700  | -4.24246700 | -2.02062500 |

|   |             |             |             |
|---|-------------|-------------|-------------|
| H | 4.60777100  | 1.12844200  | -4.34340900 |
| O | 5.11437100  | 1.66989900  | -3.72412600 |
| H | 5.88803000  | 1.98560400  | -4.20840800 |
| O | 6.91019000  | -1.25605300 | 0.16172800  |
| H | 7.56314800  | -0.77356200 | 0.68695100  |
| H | 7.41959600  | -1.71676800 | -0.51950600 |
| H | 2.26758900  | 6.12859900  | -3.00213600 |
| O | 3.00993500  | 5.96391800  | -2.40573900 |
| H | 3.73212700  | 6.51295200  | -2.73820000 |
| O | -2.48114100 | 1.52363800  | -5.94004300 |
| H | -1.73682700 | 1.08771600  | -6.37474400 |
| H | -3.03459400 | 1.88224600  | -6.64573200 |
| H | -0.80622200 | 6.10637100  | -3.64197400 |
| O | -1.54391100 | 5.63313200  | -3.23849700 |
| H | -2.26908300 | 6.26732600  | -3.18486200 |
| H | -6.38774400 | -1.01557100 | -2.51247000 |
| O | -5.92585400 | -0.19876000 | -2.78281200 |
| H | -6.51004500 | 0.53762000  | -2.57237100 |

|   |             |            |             |
|---|-------------|------------|-------------|
| H | -2.09133900 | 6.50169000 | 3.21952600  |
| O | -2.10944800 | 5.68489400 | 2.70376300  |
| H | -3.00625500 | 5.60906300 | 2.35216000  |
| H | 2.49356800  | 6.41999200 | -0.65749600 |
| O | 2.18875900  | 6.24617800 | 0.25398600  |
| H | 2.84197500  | 6.62648100 | 0.85070800  |

 $F-Al_{13}$ 

|    |             |             |             |
|----|-------------|-------------|-------------|
| O  | 4.10234600  | -1.23131600 | 1.47957400  |
| Al | 2.74098000  | -1.35543100 | 0.24900800  |
| O  | 0.98053500  | -1.31808200 | -0.79369200 |
| Al | 0.14524700  | -2.98316600 | 0.00948800  |
| O  | -0.75556000 | -1.42194800 | 0.99782500  |
| O  | 3.26661300  | 0.18924900  | -0.63155200 |
| O  | 1.63847100  | 0.12237300  | 1.16072600  |
| O  | -0.76180200 | -4.37210300 | 0.83708000  |
| O  | -1.36557100 | -2.56509200 | -1.05925000 |
| O  | 1.15149600  | -4.08152800 | -1.10445100 |

|    |             |             |             |
|----|-------------|-------------|-------------|
| O  | 1.64417500  | -2.63726600 | 1.10647800  |
| O  | 3.45639800  | -2.58742600 | -0.92204500 |
| Al | -2.52648600 | -1.50928400 | 0.00857100  |
| O  | -4.11061600 | -1.37692800 | -0.96649000 |
| O  | -3.08313500 | -2.98887200 | 0.97991900  |
| O  | -2.99543000 | -0.02293000 | 1.09642100  |
| O  | -1.58742600 | 0.04562100  | -0.86034900 |
| Al | 2.66906100  | 1.67293200  | 0.29163500  |
| Al | -2.62847600 | 1.53926100  | 0.08992800  |
| O  | 1.49977200  | 2.90569900  | 1.08345700  |
| O  | 3.41056200  | 2.92377800  | -0.83864200 |
| O  | 3.93228300  | 1.53067000  | 1.64560400  |
| O  | 0.90037200  | 1.52062100  | -0.80249000 |
| O  | -1.57933900 | 2.69328000  | -0.98129100 |
| O  | -3.26461800 | 2.95673800  | 1.10502000  |
| O  | -4.16627300 | 1.33823900  | -0.90725700 |
| O  | -0.83021800 | 1.52743000  | 1.00161400  |
| Al | -0.02196600 | 3.11391600  | -0.00349000 |

|   |             |             |             |
|---|-------------|-------------|-------------|
| O | 0.87331300  | 4.14343800  | -1.28061300 |
| O | -0.86964800 | 4.35849800  | 1.06013400  |
| H | -1.77656800 | -3.31952300 | -1.48830400 |
| H | -0.84878200 | -1.47345300 | 1.95541400  |
| H | -0.16281300 | -5.13773200 | 0.98278200  |
| H | 0.59776400  | -4.76623600 | -1.53007500 |
| H | 1.82997700  | -3.03336100 | 1.95800000  |
| H | 1.07206900  | -1.35964500 | -1.75005400 |
| H | 3.71978000  | 0.26269700  | -1.49302300 |
| H | 1.66364300  | 0.10920600  | 2.12388900  |
| H | 4.38932300  | 2.88482000  | -0.90573000 |
| H | 3.96391200  | 2.24340700  | 2.29057300  |
| H | 1.02904300  | 1.61893500  | -1.75714300 |
| H | 1.67119300  | 3.49392500  | 1.82003000  |
| H | -2.00644900 | 3.30736800  | -1.57895800 |
| H | -0.85016800 | 1.63651900  | 1.95827200  |
| H | -4.16436200 | 2.79600800  | 1.45599500  |
| H | -3.85631000 | -0.06211300 | 1.51822800  |

|    |             |             |             |
|----|-------------|-------------|-------------|
| H  | -1.61184900 | 0.05864000  | -1.82184700 |
| H  | 4.45702600  | -2.10847800 | 1.73532000  |
| H  | 4.37960400  | -2.36446300 | -1.16022500 |
| H  | 0.34218700  | 4.75956800  | -1.79627300 |
| H  | -0.30265700 | 5.14085300  | 1.20568900  |
| H  | -4.49687500 | 2.21261300  | -1.21550200 |
| H  | -3.98816500 | -2.85727900 | 1.33240400  |
| H  | -4.46423400 | -2.24824300 | -1.23826200 |
| Al | 2.67152200  | 4.23493500  | -1.94613500 |
| O  | 3.04616700  | 5.63158800  | -0.66993500 |
| H  | 3.86865200  | 5.70954100  | -0.11786100 |
| O  | 2.31040900  | 2.81186800  | -3.21756400 |
| H  | 1.76626900  | 2.89255100  | -4.10797100 |
| O  | 1.99945900  | 5.67539800  | -3.09387000 |
| H  | 1.91068300  | 5.63163200  | -4.09043100 |
| O  | 4.42316100  | 4.48543700  | -2.78417100 |
| H  | 5.00791700  | 5.24756900  | -2.50859700 |
| H  | 2.97461700  | 2.10130100  | -3.29918300 |

|    |            |             |             |
|----|------------|-------------|-------------|
| H  | 2.43486800 | 6.54512400  | -2.91922100 |
| H  | 4.50026400 | 4.41844000  | -3.76617800 |
| H  | 2.27397600 | 5.96410400  | -0.14166900 |
| Al | 5.21036500 | 0.17174800  | 2.10117800  |
| O  | 6.25141900 | 1.60443800  | 2.86081300  |
| H  | 6.77069100 | 1.48404900  | 3.70285700  |
| O  | 6.57504900 | -1.14645500 | 2.48677100  |
| H  | 7.14150900 | -1.52463800 | 1.78192000  |
| O  | 4.51777000 | -0.11206600 | 3.87680000  |
| H  | 4.45806000 | -1.04313400 | 4.21067000  |
| O  | 6.05190600 | 0.35672300  | 0.39711600  |
| H  | 6.16938700 | 1.21702800  | -0.07904800 |
| H  | 6.99794500 | -1.32396500 | 3.37598800  |
| H  | 6.54676100 | 2.42015100  | 2.39267800  |
| H  | 4.52674400 | 0.49581500  | 4.65671900  |
| H  | 5.97831800 | -0.35066100 | -0.28465500 |
| Al | 2.99533400 | -4.33815100 | -1.39791200 |
| O  | 2.65538200 | -6.15454700 | -2.02810500 |

|    |             |             |             |
|----|-------------|-------------|-------------|
| H  | 3.16432200  | -6.42864400 | -2.83017200 |
| O  | 3.26687500  | -5.06006700 | 0.38220600  |
| H  | 3.84092500  | -4.62537200 | 1.05619800  |
| O  | 4.89891600  | -4.64516300 | -1.70015400 |
| H  | 5.54198800  | -4.95136800 | -1.02518200 |
| O  | 2.78675200  | -3.87214100 | -3.26972100 |
| H  | 2.03196900  | -4.20643900 | -3.80540000 |
| H  | 5.34523800  | -4.56315800 | -2.58585400 |
| H  | 2.63989200  | -6.91418400 | -1.39137800 |
| H  | 2.49566400  | -5.46451000 | 0.86028500  |
| H  | 3.22873700  | -3.11512300 | -3.73397300 |
| Al | -2.59235000 | -4.80231100 | 0.99684800  |
| O  | -2.20961000 | -6.73150700 | 0.86464000  |
| H  | -2.15568800 | -7.34987100 | 1.63288200  |
| O  | -4.50697200 | -5.25194300 | 1.19476900  |
| H  | -5.03056300 | -5.65294400 | 0.44150900  |
| O  | -2.49246500 | -4.95464900 | 2.88985700  |
| H  | -3.06791500 | -4.42241800 | 3.49689500  |

|    |             |             |             |
|----|-------------|-------------|-------------|
| O  | -2.80018800 | -4.96712500 | -0.94717800 |
| H  | -2.12365300 | -5.39869000 | -1.52120900 |
| H  | -4.86152100 | -5.62390500 | 2.03476300  |
| H  | -1.70540600 | -5.34994900 | 3.34713100  |
| H  | -2.66053400 | -7.22186800 | 0.13658200  |
| H  | -3.56313800 | -4.58973600 | -1.48618100 |
| Al | -5.42913900 | -0.02939200 | -1.07503800 |
| O  | -6.82707800 | 1.34193300  | -1.26278800 |
| H  | -7.35797000 | 1.64841700  | -0.48041900 |
| O  | -5.75779300 | -0.07167600 | 0.86138200  |
| H  | -5.83922000 | -0.92027900 | 1.36222600  |
| O  | -6.83904000 | -1.38405200 | -1.07668000 |
| H  | -7.30411900 | -1.67385700 | -1.91134700 |
| O  | -5.42478500 | -0.00633100 | -2.98858700 |
| H  | -5.36950100 | 0.82629800  | -3.51031400 |
| H  | -7.44015700 | 1.24972000  | -2.02800500 |
| H  | -7.53129200 | -1.27177800 | -0.38557500 |
| H  | -5.31006100 | -0.81495700 | -3.55760500 |

|    |             |            |             |
|----|-------------|------------|-------------|
| H  | -5.77129000 | 0.71998000 | 1.47282400  |
| Al | -2.68137300 | 4.71370600 | 1.48768300  |
| O  | -4.53573300 | 5.19761000 | 1.90610000  |
| H  | -4.72591500 | 5.73519400 | 2.71058600  |
| O  | -2.16260300 | 6.56970600 | 1.85820100  |
| H  | -2.08532400 | 6.91956800 | 2.79600600  |
| O  | -2.49860600 | 4.31424300 | 3.32753300  |
| H  | -3.19427400 | 3.86084700 | 3.84680700  |
| O  | -3.00550400 | 5.31203100 | -0.34066200 |
| H  | -2.38943400 | 5.93908900 | -0.79161900 |
| H  | -1.69685900 | 4.57927600 | 3.90991700  |
| H  | -2.45375900 | 7.33312400 | 1.31489400  |
| H  | -5.21850600 | 5.37208800 | 1.21774200  |
| H  | -3.60630900 | 4.85984000 | -0.98235700 |
| Al | 0.05420100  | 0.07610000 | 0.11789900  |
| O  | 5.38712000  | 5.98890600 | 0.60913500  |
| H  | 5.39558000  | 6.68865500 | 1.27806800  |
| H  | 5.77360700  | 6.38145200 | -0.20302100 |

|   |            |             |             |
|---|------------|-------------|-------------|
| O | 4.28600600 | 0.55785600  | -3.11248600 |
| H | 5.14821800 | 0.95584300  | -3.27932700 |
| H | 4.28283100 | -0.26914500 | -3.63925300 |
| O | 0.86595000 | 6.48099300  | 0.64529600  |
| H | 1.00712300 | 7.17330100  | 1.30336100  |
| H | 0.24156800 | 6.84224800  | -0.02089000 |
| O | 0.98621600 | 3.16663400  | -5.26690000 |
| H | 1.19395500 | 3.99510400  | -5.73816500 |
| H | 0.56995800 | 2.54349400  | -5.87289900 |
| O | 3.47091700 | 8.02489000  | -2.88778300 |
| H | 3.19670700 | 8.74249500  | -2.29948200 |
| H | 3.56895400 | 8.45650200  | -3.74910700 |
| O | 5.72498000 | 6.65711200  | -2.02768800 |
| H | 5.06704000 | 7.33450400  | -2.29554100 |
| H | 6.58321400 | 6.94841300  | -2.36568300 |
| O | 4.61106700 | 4.58137000  | -5.54600000 |
| H | 5.36074900 | 5.12271800  | -5.83383300 |
| H | 4.67125800 | 3.78686400  | -6.09516700 |

|   |             |            |             |
|---|-------------|------------|-------------|
| O | -4.74842100 | 3.83758200 | -1.73621500 |
| H | -4.93330600 | 3.67222100 | -2.68238000 |
| H | -5.53293500 | 4.27579000 | -1.34943700 |
| O | -1.15872700 | 7.11009500 | -1.16455200 |
| H | -1.01415100 | 7.33767600 | -2.09262100 |
| H | -1.59232400 | 7.90539700 | -0.76869700 |
| O | -0.53518000 | 5.24480400 | 4.56709300  |
| H | -0.07510400 | 4.87497400 | 5.33038600  |
| H | -0.88203100 | 6.11577100 | 4.83043700  |
| O | -4.63167300 | 2.98313800 | 4.60872600  |
| H | -5.28957700 | 3.49062600 | 5.10335900  |
| H | -4.33000400 | 2.31861300 | 5.24571800  |
| O | -2.52264000 | 8.86201300 | 0.33326000  |
| H | -3.33182300 | 9.21325400 | -0.06425900 |
| H | -2.07172700 | 9.63876600 | 0.69525800  |
| O | -4.85863100 | 6.73400900 | 4.20259300  |
| H | -5.40850500 | 7.52056100 | 4.07274000  |
| H | -5.21166100 | 6.33777800 | 5.01086400  |

|   |             |             |             |
|---|-------------|-------------|-------------|
| O | -6.33962200 | 5.46088300  | -0.15180100 |
| H | -6.35890800 | 6.31917000  | -0.59951700 |
| H | -7.26298400 | 5.30945700  | 0.09240100  |
| O | -2.15635300 | 7.43805300  | 4.31845200  |
| H | -1.90122900 | 8.31676900  | 4.62884900  |
| H | -3.09535500 | 7.30852400  | 4.55445700  |
| O | 7.36405300  | -1.59824600 | 4.92212000  |
| H | 7.46592100  | -0.68344300 | 5.26777000  |
| H | 8.14005200  | -2.10041600 | 5.20497200  |
| O | 7.31154500  | 1.09962000  | 5.24891000  |
| H | 6.57318100  | 1.34577900  | 5.84310500  |
| H | 8.10780900  | 1.54334700  | 5.57211900  |
| O | 6.95205800  | 3.81973100  | 1.39966100  |
| H | 7.87436900  | 4.07415700  | 1.54556400  |
| H | 6.43601200  | 4.65322500  | 1.34466100  |
| O | 7.82172300  | -2.56300600 | 0.46045400  |
| H | 7.76324300  | -3.53222000 | 0.53935000  |
| H | 8.75912700  | -2.35333000 | 0.33559700  |

|   |            |             |             |
|---|------------|-------------|-------------|
| O | 6.03572900 | -1.68748600 | -1.33514500 |
| H | 6.77534900 | -2.10417500 | -0.82755300 |
| H | 6.37476900 | -1.52171900 | -2.22218200 |
| O | 6.14958000 | 2.68743500  | -0.82760400 |
| H | 6.57897000 | 3.19028200  | -0.08503000 |
| H | 6.71513600 | 2.80866300  | -1.59942800 |
| O | 4.86723400 | -2.65777900 | 4.66054500  |
| H | 5.78350900 | -2.47519900 | 4.96688700  |
| H | 4.41085600 | -3.07273500 | 5.40496600  |
| O | 4.75768500 | 1.34564600  | 6.15823800  |
| H | 4.39635700 | 2.23602800  | 6.26810000  |
| H | 4.47961400 | 0.86803400  | 6.95279200  |
| O | 1.10765600 | -6.25115200 | 1.40212700  |
| H | 1.29120400 | -7.11958600 | 0.99586500  |
| H | 0.82175000 | -6.39643800 | 2.33075000  |
| O | 6.90252400 | -5.26705700 | 0.15648100  |
| H | 7.64739300 | -5.62012200 | -0.35398000 |
| H | 6.74911200 | -5.95511300 | 0.82061700  |

|   |            |             |             |
|---|------------|-------------|-------------|
| O | 4.15728100 | -6.71379400 | -4.30026700 |
| H | 3.68661700 | -6.93764000 | -5.11557400 |
| H | 4.76914600 | -7.45526400 | -4.18039900 |
| O | 5.73264500 | -4.38464800 | -4.18354800 |
| H | 5.22000100 | -5.15043200 | -4.51613600 |
| H | 6.62674200 | -4.48491900 | -4.53945300 |
| O | 0.58798100 | -4.93030400 | -4.62507900 |
| H | 0.10309600 | -4.30558400 | -5.18503600 |
| H | 0.77582300 | -5.67002300 | -5.22025200 |
| O | 4.30615400 | -2.01132300 | -4.44375400 |
| H | 5.01576200 | -2.68735000 | -4.50166800 |
| H | 4.10855000 | -1.78244900 | -5.36382900 |
| O | 2.40877200 | -8.13130700 | -0.19744800 |
| H | 3.19194800 | -8.34678200 | 0.32916500  |
| H | 2.12445700 | -8.98422400 | -0.55650500 |
| O | 4.87884400 | -3.75264400 | 2.13938900  |
| H | 4.84569600 | -3.61201700 | 3.11653000  |
| H | 5.79380100 | -3.98612600 | 1.94388400  |

|   |             |             |             |
|---|-------------|-------------|-------------|
| O | -5.57095800 | -2.47223500 | 1.98258600  |
| H | -5.33841300 | -2.74946800 | 2.90191700  |
| H | -6.14848100 | -3.16036300 | 1.63292200  |
| O | -5.68030300 | 2.14737900  | 2.18840400  |
| H | -6.62008500 | 2.35727300  | 2.02607200  |
| H | -5.47435800 | 2.31886800  | 3.13338500  |
| O | -8.79216300 | -0.84233000 | 0.86412800  |
| H | -9.69752300 | -0.99012100 | 0.55260800  |
| H | -8.76541800 | -1.29746600 | 1.71768000  |
| O | -8.06056300 | -1.87731600 | -3.36572200 |
| H | -8.40901800 | -0.98440600 | -3.56200400 |
| H | -8.78173300 | -2.50278500 | -3.51875700 |
| O | -5.40264300 | 2.51498600  | -4.16113700 |
| H | -4.81259200 | 2.60204500  | -4.92451500 |
| H | -6.24574600 | 2.85736100  | -4.48802800 |
| O | -8.61871300 | 0.85671800  | -3.35075000 |
| H | -8.51463600 | 1.23639600  | -4.23377600 |
| H | -9.53130300 | 1.07543900  | -3.11149400 |

|   |             |             |             |
|---|-------------|-------------|-------------|
| O | -5.52335700 | -2.35770300 | -4.18520300 |
| H | -5.18733300 | -2.55112500 | -5.07169900 |
| H | -6.50215000 | -2.35737000 | -4.23026900 |
| O | -8.14789000 | 1.88012500  | 0.97923200  |
| H | -8.48311100 | 0.97187000  | 1.13676100  |
| H | -8.90653500 | 2.46599800  | 1.10252600  |
| O | -3.62113000 | -8.07027100 | -1.12279000 |
| H | -3.26937900 | -8.19873800 | -2.01459500 |
| H | -3.89339800 | -8.95911300 | -0.84886600 |
| O | -0.39678900 | -6.40025800 | 3.71673100  |
| H | -0.03278700 | -6.31579100 | 4.60904800  |
| H | -0.81169000 | -7.28718900 | 3.67396600  |
| O | -5.72981500 | -6.00394000 | 3.58406800  |
| H | -5.48022700 | -6.78204100 | 4.10066800  |
| H | -6.69697200 | -6.03992900 | 3.55971700  |
| O | -0.63587400 | -5.81093100 | -2.30537700 |
| H | -0.41127600 | -6.74605400 | -2.23133800 |
| H | -0.40495600 | -5.56031700 | -3.22865800 |

|   |             |             |             |
|---|-------------|-------------|-------------|
| O | -5.70667800 | -6.23848900 | -0.91434700 |
| H | -6.60191900 | -6.60370400 | -0.92932500 |
| H | -5.10766500 | -6.96607200 | -1.18233300 |
| O | -4.85692500 | -3.85378800 | -2.00005100 |
| H | -5.48031600 | -4.58186300 | -1.80894000 |
| H | -5.03998500 | -3.51769600 | -2.90746400 |
| O | -4.47469100 | -3.68321800 | 4.16639700  |
| H | -4.37494500 | -3.24833000 | 5.02510400  |
| H | -5.04243500 | -4.47023100 | 4.30353300  |
| O | -1.93297200 | -8.50821100 | 2.93519500  |
| H | -1.52132500 | -9.35652000 | 2.71667800  |
| H | -2.64561000 | -8.73761200 | 3.54749300  |
| O | 2.06017600  | 5.57778300  | -5.71760000 |
| H | 1.71243200  | 6.23561900  | -6.33415700 |
| H | 2.99096600  | 5.39108300  | -5.94947300 |

## References

- 1 J. VandeVondele, M. Krack, F. Mohamed, M. Parrinello, T. Chassaing and J. Hutter, *Comput. Phys. Commun.*, 2005, **167**, 103-128.
- 2 T. D. Kühne, M. Iannuzzi, M. Del Ben, V. V. Rybkin, P. Seewald, F. Stein, T. Laino, R. Z. Khaliullin, O. Schütt, F. Schiffmann, D. Golze, J. Wilhelm, S. Chulkov, M. H. Bani-Hashemian, V. Weber, U. Borštnik, M. TAILLEFUMIER, A. S. Jakobovits, A. Lazzaro, H. Pabst, T. Müller, R. Schade, M. Guidon, S. Andermatt, N. Holmberg, G. K. Schenter, A. Hehn, A. Bussy, F. Belleflamme, G. Tabacchi, A. Glöß, M. Lass, I. Bethune, C. J. Mundy, C. Plessl, M. Watkins, J. VandeVondele, M. Krack and J. Hutter, *J. Chem. Phys.*, 2020, **152**, 194103.
- 3 A. D. Becke, *Phys. Rev. A*, 1988, **38**, 3098-3100.
- 4 C. Lee, W. Yang and R. G. Parr, *Phys. Rev. B*, 1988, **37**, 785-789.
- 5 S. Grimme, J. Antony, S. Ehrlich and H. Krieg, *J. Chem. Phys.*, 2010, **132**, 154104.
- 6 J. Wang, G. Román-Pérez, J. M. Soler, E. Artacho and M. V. Fernández-Serra, *J. Chem. Phys.*, 2011, **134**, 024516.
- 7 M. J. Gillan, D. Alfè and A. Michaelides, *J. Chem. Phys.*, 2016, **144**, 130901.
- 8 S. Goedecker, M. Teter and J. Hutter, *Phys. Rev. B*, 1996, **54**, 1703-1710.
- 9 B. G. Lippert, J. H. Parrinello and Michele, *Mol. Phys.*, 1997, **92**, 477-488.
- 10 J. VandeVondele and J. Hutter, *J. Chem. Phys.*, 2007, **127**, 114105.
- 11 S. Nosé, *J. Chem. Phys.*, 1984, **81**, 511-519.
- 12 W. G. Hoover, *Phys. Rev. A*, 1985, **31**, 1695-1697.
- 13 M. Chen, L. Zheng, B. Santra, H.-Y. Ko, R. A. DiStasio Jr, M. L. Klein, R. Car and X. Wu, *Nat. Chem.*, 2018, **10**, 413-419.
- 14 E. Donati, P. Vidossich and M. De Vivo, *ACS Catal.*, 2021, **11**, 13244-13254.
- 15 G. A. Tribello, M. Bonomi, D. Branduardi, C. Camilloni and G. Bussi, *Comput. Phys. Commun.*, 2014, **185**, 604-613.
- 16 M. J. Frisch, G. W. Trucks, H. B. Schlegel, G. E. Scuseria, M. A. Robb, J. R. Cheeseman, G. Scalmani, V. Barone, G. A. Petersson, H. Nakatsuji, X. Li, M. Caricato, A. V. Marenich, J. Bloino, B. G. Janesko, R. Gomperts, B. Mennucci, H. P. Hratchian, J. V. Ortiz, A. F. Izmaylov, J. L. Sonnenberg, Williams, F. Ding, F. Lipparini, F. Egidi, J. Goings, B. Peng, A. Petrone, T. Henderson, D. Ranasinghe, V. G. Zakrzewski, J. Gao, N. Rega, G. Zheng, W. Liang, M. Hada, M. Ehara, K. Toyota, R. Fukuda, J. Hasegawa, M. Ishida, T. Nakajima, Y. Honda, O. Kitao, H. Nakai, T. Vreven, K. Throssell, J. A. Montgomery Jr., J. E. Peralta, F. Ogliaro, M. J. Bearpark, J. J. Heyd, E. N. Brothers, K. N. Kudin, V. N. Staroverov, T. A. Keith, R. Kobayashi, J. Normand, K. Raghavachari, A. P. Rendell, J. C. Burant, S. S. Iyengar, J. Tomasi, M. Cossi, J. M. Millam, M. Klene, C. Adamo, R. Cammi, J. W. Ochterski, R. L. Martin, K. Morokuma, O. Farkas, J. B. Foresman and D. J. Fox, *Gaussian 16 Rev. B.01*, Wallingford, CT, 2016.
- 17 E. Cancès, B. Mennucci and J. Tomasi, *J. Chem. Phys.*, 1997, **107**, 3032-3041.
- 18 A. J. Bridgeman, G. Cavigliasso, L. R. Ireland and J. Rothery, *J. Chem. Soc., Dalton Trans.*, 2001, 2095-2108.
- 19 T. Lu and F. Chen, *J. Comput. Chem.*, 2011, **33**, 580-592.
